# Supplementary material for: Interleukin-6 increases the expression and activity of insulin-degrading enzyme
Source: PubMed Central journal article supplement (PMC5399448; doi:10.1038/srep46750), 2017-04-21
Supplement: srep46750-s1.pdf [file srep46750-s1.pdf]

## Supplementary Figures

### **Interleukin-6 increases the expression and activity of insulin-degrading enzyme**

Mirian A. Kurauti<sup>1\*</sup>, José M. Costa-Júnior<sup>1</sup>, Sandra M. Ferreira<sup>1</sup>, Gustavo J. Santos<sup>1,2</sup>, Carlos H. G. Sponton<sup>1</sup>,  
Everardo M. Carneiro<sup>1</sup>, Guilherme D. Telles<sup>3</sup>, Mara P. T. Chacon-Mikahil<sup>3</sup>, Cláudia R. Cavaglieri<sup>3</sup>, Luiz F.  
Rezende<sup>1,4</sup>, Antonio C. Boschero<sup>1</sup>

<sup>1</sup>Obesity and Comorbidities Research Center (OCRC), Institute of Biology, University of Campinas (UNICAMP), Campinas, SP, Brazil

<sup>2</sup>Department of Physiological Sciences, Center of Biological Sciences, Federal University of Santa Catarina (UFSC), Florianópolis, SC, Brazil

<sup>3</sup>Exercise Physiology Laboratory (FISEX), Faculty of Physical Education, University of Campinas (UNICAMP), Campinas, SP, Brazil

<sup>4</sup>Laboratory of Health Sciences, Department of Physiopathology, State University of Montes Claros (UNIMONTES), Montes Claros, MG, Brazil

\*Corresponding author: Obesity and Comorbidities Research Center (OCRC), Institute of Biology, University of Campinas (UNICAMP). Rua Carl Von Linnaeus, Bloco Z, zip code 13083864, Campinas, SP, Brazil.

Phone number: +55 19 35210015. E-mail: mirian.kurauti@hotmail.com

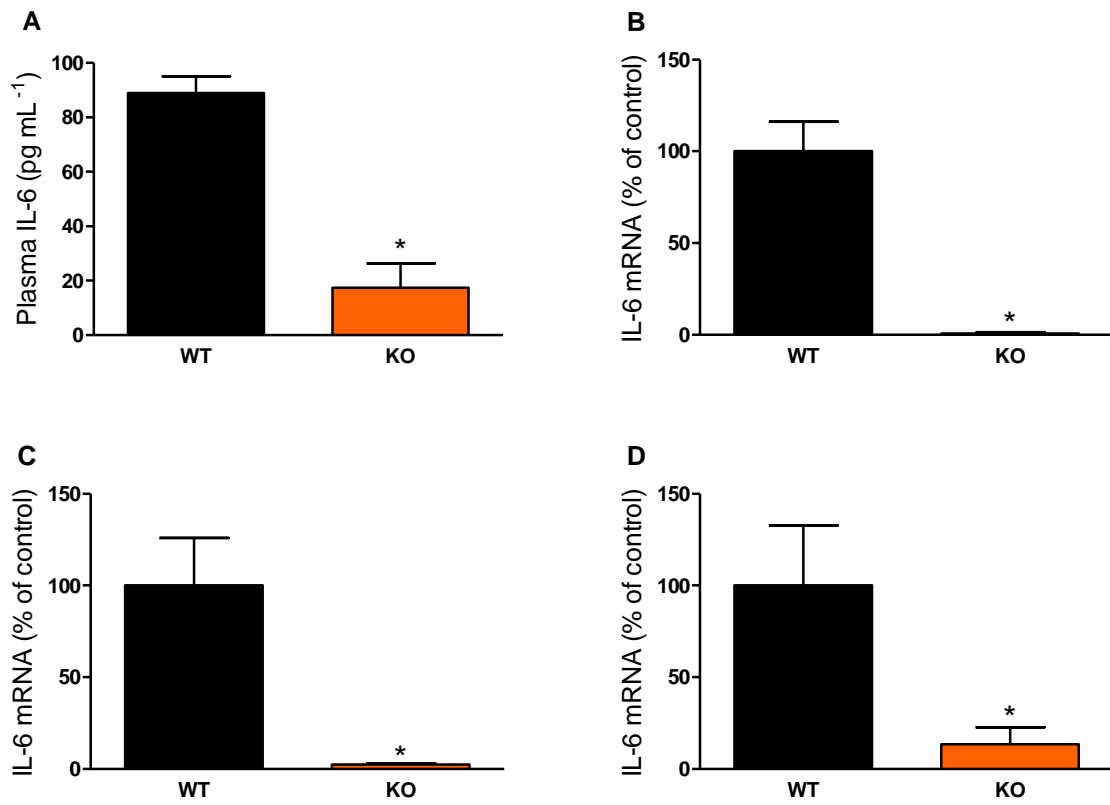

**Supplementary figure 1. Plasma concentration and mRNA expression of IL-6.** Plasma IL-6 concentration (A) and IL-6 mRNA expression in the liver (B), gastrocnemius skeletal muscle (C) and perigonadal adipose tissue (D). WT, wild type mice; and KO, IL-6 knockout mice. Data are presented as the mean  $\pm$  S.E.M. n=4. \*  $p \leq 0.05$  vs WT.

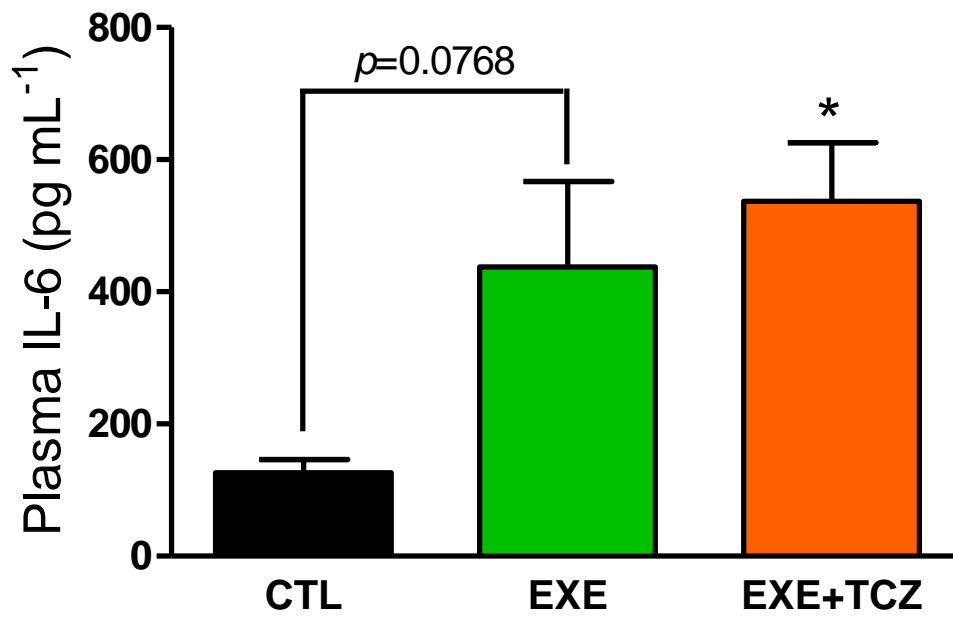

**Supplementary figure 2. Plasma IL-6 concentrations in mice after acute exercise.** IL-6 concentration in the plasma of mice. CTL, control mice; EXE, exercised mice; and EXE+TCZ, exercised mice treated with 2 mg kg<sup>-1</sup> Tocilizumab 1-h before the acute exercise protocol (a single bout of exercise on a treadmill inclined at 25° for 3-h at 60-70% of VO<sub>2</sub> max). Data are presented as the mean ± S.E.M. n=3. \* p ≤ 0.05 vs CTL.

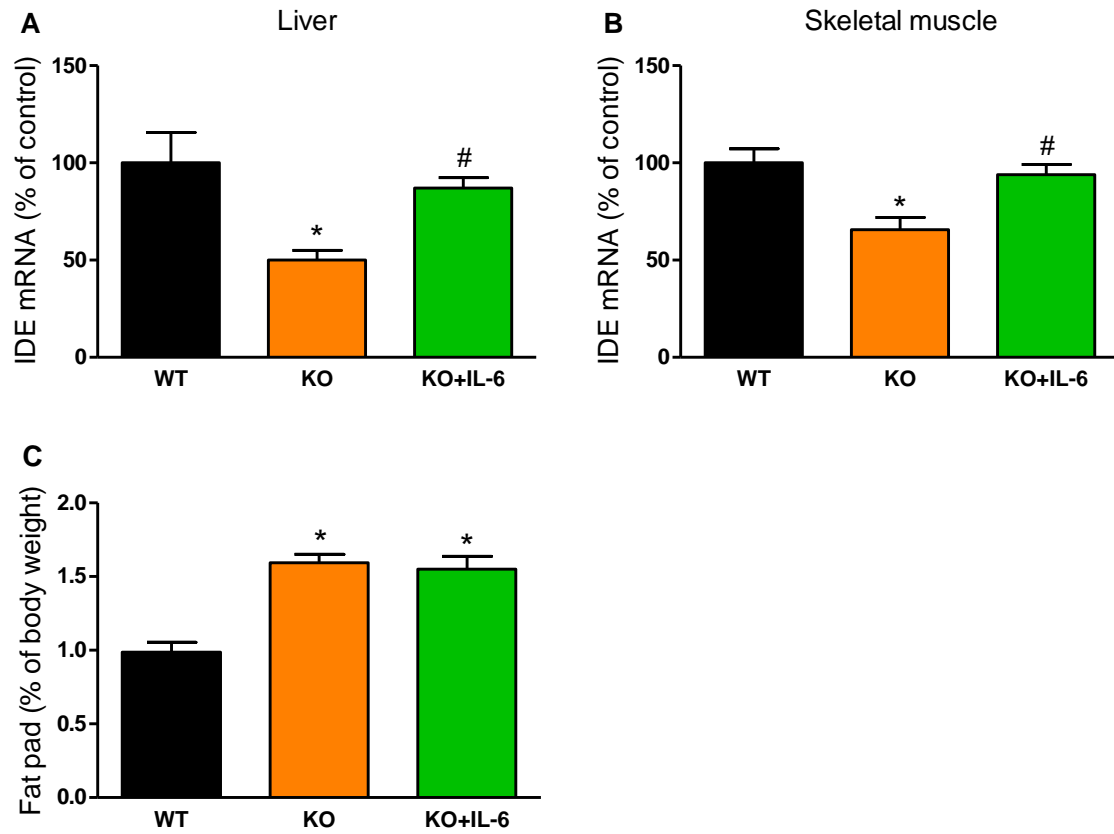

**Supplementary figure 3. IDE mRNA expression and fat pad of KO mice after IL-6 treatment.** IDE mRNA expression in the liver (A) and gastrocnemius skeletal muscle (B) and percent of body weight of perigonadal fat pad (C) of mice. WT, wild type; KO, IL-6 knockout and KO+IL-6, IL-6 KO mice treated with 200 ng per day IL-6 during 3 days before the experiments. Data are presented as the mean  $\pm$  S.E.M.  $n=5-6$ . \*  $p < 0.05$  vs WT, #  $p < 0.05$  vs KO.
